# Supplementary material
Source: Frontiers journal article supplement (https://www.frontiersin.org/articles/535374)
Supplement: Image_2.pdf [file Image_2.pdf]

At5g58740 247777\_at

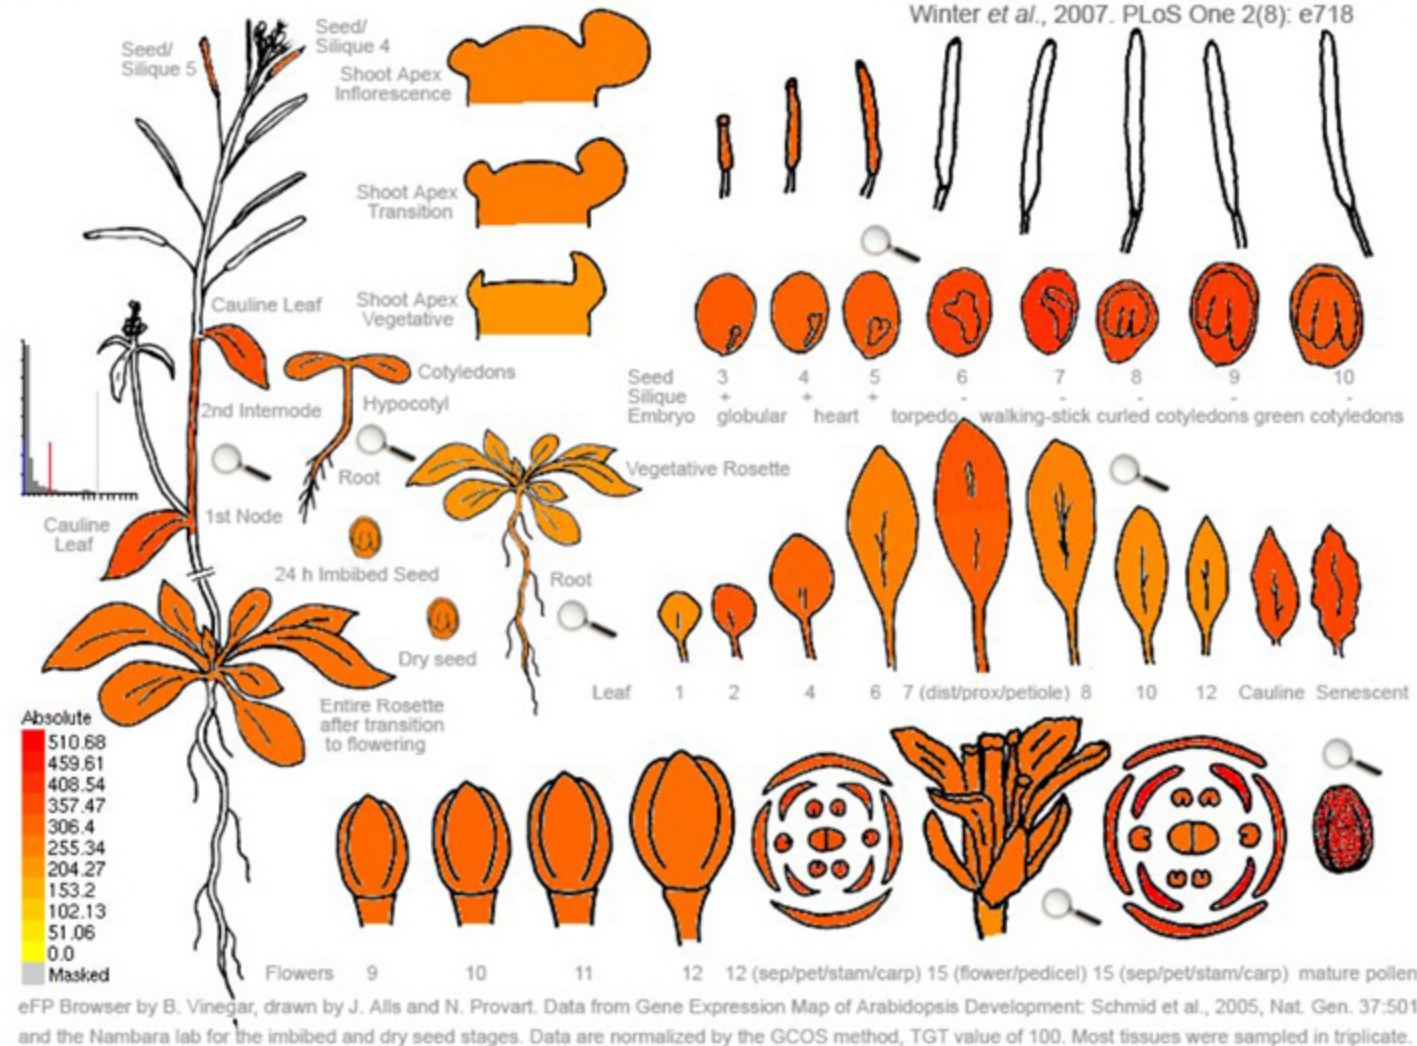

**Figure S2.** Expression pattern of *NMig1* according to the *Arabidopsis* eFP Browser in the developmental map (A) and root (B).
